# Supplementary material for: Colorimetric loop-mediated isothermal amplification (cLAMP) assay for the genotyping of a thrombophilia genetic risk factor, MTHFR (C677T)
Source: Royal Society of Chemistry journal article supplement (doi:10.1039/d5ay00215j), 2025-01-01
Supplement: d5ay00215j1.pdf [file d5ay00215j1.pdf]

## SUPPORTING INFORMATION

### **Colorimetric loop-mediated isothermal amplification (cLAMP) assay for the genotyping of a thrombophilia genetic risk factor, MTHFR (C677T)**

**Reham Altwayan<sup>1,2</sup>, Huseyin Tombuloglu<sup>1\*</sup>, Moneerah Alsaeed<sup>1</sup>, Abdulrahman Alhusil<sup>3</sup>**

<sup>1</sup>Department of Genetics Research, Institute for Research and Medical Consultations (IRMC), Imam Abdulrahman Bin Faisal University, 31441, Dammam, Saudi Arabia

<sup>2</sup>Master Program of Biotechnology, Institute for Research and Medical Consultations, Imam Abdulrahman Bin Faisal University, Dammam, Saudi Arabia

<sup>3</sup>Department of Internal Medicine, King Fahad Military Medical Complex, Dhahran, Saudi Arabia

\* Corresponding author: [htoglu@iau.edu.sa](mailto:htoglu@iau.edu.sa)

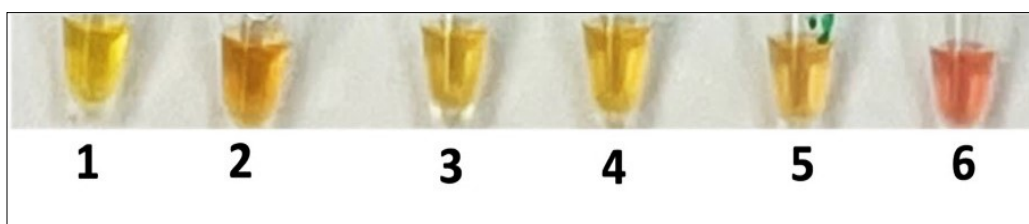

**Figure S1.** Colorimetric LAMP reaction of heterozygote (C/T) sample (Sample No.29). The samples were tested using different primer mixtures: (1)  $F_{3w}$ , (2)  $F_{3m}$ , (3)  $F_{3w} + F_{3m}$ , (4)  $F_{3w} + F_{3m1}$ , and (5)  $F_{3m1}$ . (6) Negative control.

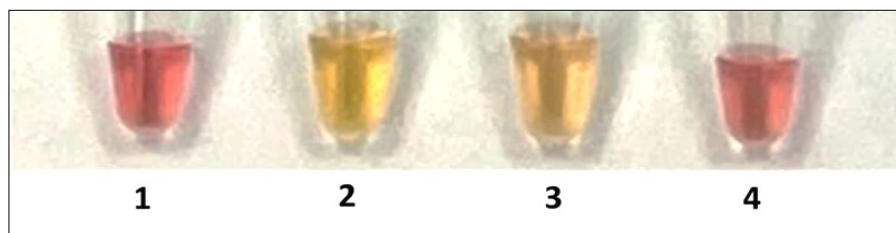

**Figure S2.** The colorimetric LAMP reaction of the homozygote mutant (T/T) sample (patient No. 97) was tested using different primer mixtures. (1) Negative control, (2)  $F_{3w} + F_{3m}$ , (3)  $F_{3m}$ , (4)  $F_{3w}$ .
